# Supplementary material for: Stability of Pharmaceutical Co-Crystals at Humid Conditions Can Be Predicted
Source: PubMed Central journal article supplement (PMC8004816; doi:10.3390/pharmaceutics13030433), 2021-03-23
Supplement: pharmaceutics-13-00433-s001.pdf [file pharmaceutics-13-00433-s001.pdf]

# Supplement Materials: Stability of Pharmaceutical Co-Crystals at Humid Conditions Can Be Predicted

Heiner Veith, Maximilian Zäh, Christian Luebbert, Naír Rodríguez-Hornedo and Gabriele Sadowski

## Compositions used to prepare Co-Crystals

Table S1. Prepared composition of API, CF, and solvent for the preparation of CCs.

| System                 | m <sub>API</sub> / g | m <sub>CF</sub> / g | m <sub>solvent</sub> / g |
|------------------------|----------------------|---------------------|--------------------------|
| SA/NA/ethanol          | 1.7795               | 1.0368              | 6.9361                   |
| CBZ/NA/methanol        | 0.9876               | 1.227               | 5.5891                   |
| TP/CA/water            | 0.7638               | 4.5011              | 2.48                     |
| Urea/GA/water (2:1 CC) | 0.9966               | 0.8326              | 3.5508                   |
| Urea/GA/water (1:1 CC) | 0.7749               | 3.3812              | 2.8882                   |

## Water sorption of prepared CC samples.

Table S2. Water sorption of SA/NA CC stored at different conditions.

| storage time / days | W <sub>water</sub> |        |        |        |
|---------------------|--------------------|--------|--------|--------|
|                     | 76% RH             | 86% RH | 93% RH | 98% RH |
| 1                   | 0.009              | 0.006  | 0.009  | 0.012  |
| 3                   | 0.006              | 0.012  | 0.010  | 0.012  |
| 7                   | 0                  | 0.004  | 0.004  | 0.008  |
| 21                  | 0.007              | 0.003  | 0.016  | 0.029  |
| 49                  | 0.011              | 0.006  | 0.002  | 0.005  |

Table S3. Water sorption of urea/GA CC (2:1) stored at different conditions.

| storage time / days | W <sub>water</sub> |        |        |        |
|---------------------|--------------------|--------|--------|--------|
|                     | 76% RH             | 86% RH | 93% RH | 98% RH |
| 1                   | 0.014              | 0.018  | 0.022  | 0.043  |
| 3                   | 0                  | 0.021  | 0.021  | 0.048  |
| 7                   | 0.004              | 0.009  | 0.020  | 0.036  |
| 21                  | 0.005              | 0.017  | 0.035  | 0.054  |
| 49                  | 0.002              | 0.016  | 0.016  | 0.057  |

**Table S4.** Water sorption of urea/GA CC (1:1) stored at different conditions.

| storage time / days | W <sub>water</sub> |        |        |        |
|---------------------|--------------------|--------|--------|--------|
|                     | 76% RH             | 86% RH | 93% RH | 98% RH |
| 1                   | 0                  | 0      | 0.035  | 0.036  |
| 3                   | 0.015              | 0.005  | 0.078  | 0.137  |
| 7                   | 0                  | 0      | 0.068  | 0.172  |
| 21                  | 0.013              | 0.005  | 0.077  | 0.245  |
| 49                  | 0                  | 0      | 0.055  | 0.195  |

**Table S5.** Water sorption of CBZ/NA CC stored at different conditions.

| storage time / days | W <sub>water</sub> |        |        |        |
|---------------------|--------------------|--------|--------|--------|
|                     | 76% RH             | 86% RH | 93% RH | 98% RH |
| 1                   | 0                  | 0.007  | 0.003  | 0.020  |
| 3                   | 0.007              | 0.013  | 0      | 0.031  |
| 7                   | 0                  | 0.002  | 0.007  | 0.024  |
| 21                  | 0.019              | 0.009  | 0.007  | 0.046  |
| 49                  | 0                  | 0.002  | 0.007  | 0.022  |

**Table S6.** Water sorption of TP/CA CC stored at different conditions.

| storage time / days | W <sub>water</sub> |        |        |        |
|---------------------|--------------------|--------|--------|--------|
|                     | 76% RH             | 86% RH | 93% RH | 98% RH |
| 1                   | 0.008              | 0.087  | 0.129  | 0.190  |
| 3                   | 0.022              | 0.169  | 0.253  | 0.304  |
| 7                   | 0.010              | 0.174  | 0.240  | 0.361  |
| 21                  | 0.016              | 0.195  | 0.246  | 0.393  |
| 49                  | 0.011              | 0.196  | 0.242  | 0.389  |

**Table S7: Water sorption of SA/NA CC in presence of excipient stored at different conditions and the mass fraction of excipient present next to the prepared CC.**

| additional excipient | storage condition | storage time / days | W <sub>water</sub> | W <sub>excipient</sub> |
|----------------------|-------------------|---------------------|--------------------|------------------------|
| fructose             | 60%               | 1                   | 0.007              | 0.35                   |
|                      |                   | 3                   | 0.006              | 0.24                   |
|                      |                   | 7                   | 0.012              | 0.27                   |
|                      |                   | 21                  | 0.007              | 0.25                   |
|                      |                   | 49                  | 0.011              | 0.42                   |
|                      | 75%               | 1                   | 0.073              | 0.28                   |
|                      |                   | 3                   | 0.084              | 0.29                   |
|                      |                   | 7                   | 0.073              | 0.25                   |
|                      |                   | 21                  | 0.081              | 0.25                   |
|                      |                   | 49                  | 0.071              | 0.24                   |
| xylitol              | 60%               | 1                   | 0.012              | 0.25                   |
|                      |                   | 3                   | 0.009              | 0.29                   |
|                      |                   | 7                   | 0                  | 0.21                   |
|                      |                   | 21                  | 0.000              | 0.36                   |
|                      |                   | 49                  | 0.004              | 0.25                   |
|                      | 75%               | 1                   | 0.004              | 0.26                   |
|                      |                   | 3                   | 0.013              | 0.29                   |
|                      |                   | 7                   | 0.003              | 0.32                   |
|                      |                   | 21                  | 0                  | 0.26                   |
|                      |                   | 49                  | 0.011              | 0.36                   |
|                      | 85%               | 1                   | 0.056              | 0.20                   |
|                      |                   | 3                   | 0.152              | 0.25                   |
|                      |                   | 7                   | 0.197              | 0.34                   |
|                      |                   | 21                  | 0.156              | 0.24                   |
|                      |                   | 49                  | 0.203              | 0.33                   |

**Table S8.** Water sorption of CBZ/NA CC in presence of excipient stored at different conditions and the mass fraction of excipient present next to the prepared CC.

| additional excipient | storage condition | storage time / days | W <sub>water</sub> | W <sub>excipient</sub> |
|----------------------|-------------------|---------------------|--------------------|------------------------|
| fructose             | 60%               | 1                   | 0.007              | 0.27                   |
|                      |                   | 3                   | 0.016              | 0.27                   |
|                      |                   | 7                   | 0.006              | 0.34                   |
|                      |                   | 21                  | 0                  | 0.22                   |
|                      |                   | 49                  | 0.016              | 0.32                   |
|                      | 75%               | 1                   | 0.093              | 0.33                   |
|                      |                   | 3                   | 0.089              | 0.27                   |
|                      |                   | 7                   | 0.111              | 0.40                   |
|                      |                   | 21                  | 0.129              | 0.40                   |
|                      |                   | 49                  | 0.103              | 0.34                   |
| xylitol              | 60%               | 1                   | 0.009              | 0.29                   |
|                      |                   | 3                   | 0                  | 0.26                   |
|                      |                   | 7                   | 0.010              | 0.32                   |
|                      |                   | 21                  | 0.019              | 0.32                   |
|                      |                   | 49                  | 0.007              | 0.46                   |
|                      | 85%               | 1                   | 0.069              | 0.44                   |
|                      |                   | 3                   | 0.112              | 0.37                   |
|                      |                   | 7                   | 0.256              | 0.50                   |
|                      |                   | 21                  | 0.211              | 0.38                   |
|                      |                   | 49                  | 0.245              | 0.44                   |

**Table S9.** Water sorption of TP/CA CC in presence of excipient stored at different conditions and the mass fraction of excipient present next to the prepared CC.

| additional excipient | storage condition | storage time / days | W <sub>water</sub> | W <sub>excipient</sub> |
|----------------------|-------------------|---------------------|--------------------|------------------------|
| fructose             | 60%               | 1                   | 0.048              | 0.42                   |

|  |     |    |       |      |
|--|-----|----|-------|------|
|  |     | 3  | 0.053 | 0.41 |
|  |     | 7  | 0.095 | 0.40 |
|  |     | 21 | 0.110 | 0.42 |
|  |     | 49 | 0.099 | 0.34 |
|  |     | 1  | 0.091 | 0.42 |
|  |     | 3  | 0.129 | 0.41 |
|  | 75% | 7  | 0.164 | 0.33 |
|  |     | 21 | 0.146 | 0.32 |
|  |     | 49 | 0.146 | 0.43 |
|  |     | 1  | 0.013 | 0.34 |
|  |     | 3  | 0.016 | 0.47 |
|  | 60% | 7  | 0.024 | 0.37 |
|  |     | 21 | 0.028 | 0.37 |
|  |     | 49 | 0.076 | 0.30 |
|  |     | 1  | 0.062 | 0.43 |
|  |     | 3  | 0.107 | 0.38 |
|  | 75% | 7  | 0.144 | 0.39 |
|  |     | 21 | 0.162 | 0.41 |
|  |     | 49 | 0.133 | 0.35 |
|  |     | 1  | 0.137 | 0.30 |
|  |     | 3  | 0.202 | 0.22 |
|  | 85% | 7  | 0.240 | 0.30 |
|  |     | 21 | 0.257 | 0.36 |
|  |     | 49 | 0.290 | 0.49 |

xylitol
